## It's not black and white: Perspectives of Western Canadian beef farmers on dairy-beef production

Bianca Vandresen<sup>1</sup>, Daniel M. Weary<sup>1</sup>, Marina A. G. von Keyserlingk<sup>1\*</sup>

<sup>1</sup>Animal Welfare Program, Faculty of Land and Food Systems, The University of British Columbia, Vancouver, BC V6T 1Z6 Canada

\*Corresponding author

Email: nina@mail.ubc.ca (MvK)

**Supplementary Material 4.** Number of Canadian beef farmers who participated in the study (n=20) by province and by type of beef operation.

| <b>Beef phase</b>         | <b>AB</b> | <b>BC</b> | <b>SK</b> | <b>Total</b> |
|---------------------------|-----------|-----------|-----------|--------------|
| Backgrounding             | 1         | -         | -         | 1            |
| Cow-calf                  | 2         | 6         | 1         | 9            |
| Cow-calf and backgrounder | 3         | -         | -         | 3            |
| Cow-calf and feedlot      | 3         | -         | -         | 3            |
| Feedlot                   | -         | 2         | -         | 2            |
| Self-production           | 2         | -         | -         | 2            |
| <b>Total</b>              | <b>11</b> | <b>8</b>  | <b>1</b>  | <b>20</b>    |
